# Supplementary material for: The fate of fixed nitrogen in Santa Barbara Basin sediments during seasonal anoxia
Source: Copernicus journal article supplement (doi:10.5194/bg-21-3041-2024), 2024-06-28
Supplement: Supplementary file 1 [file bg-21-3041-2024-supplement.pdf]

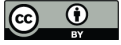

*Supplement of*

## **The fate of fixed nitrogen in Santa Barbara Basin sediments during seasonal anoxia**

**Xuefeng Peng et al.**

*Correspondence to:* Xuefeng Peng (xpeng@seoe.sc.edu) and David L. Valentine (valentine@ucsb.edu)

The copyright of individual parts of the supplement might differ from the article licence.

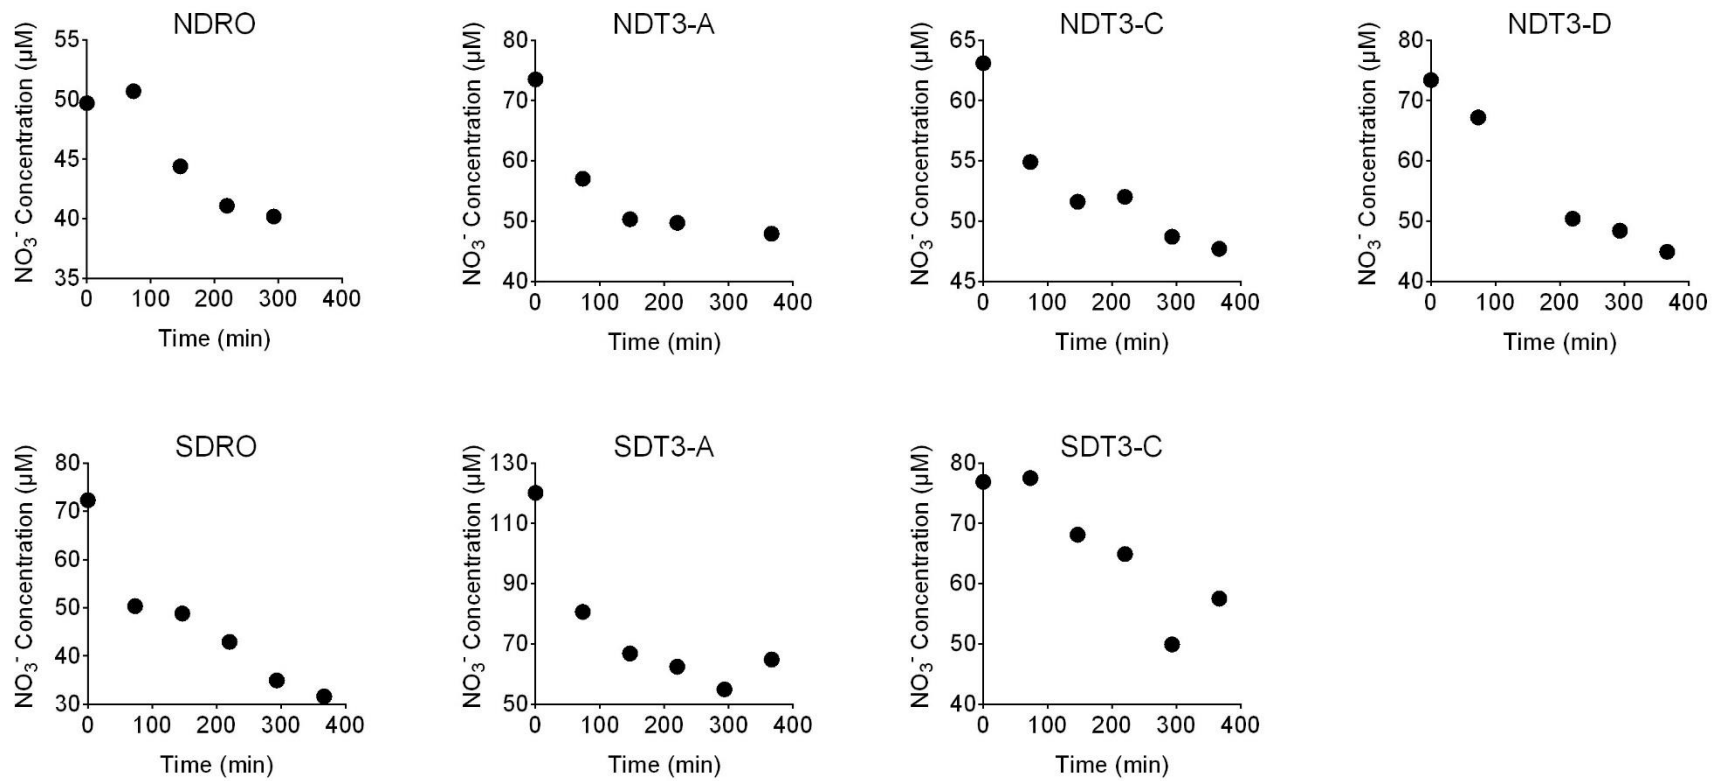

**Figure S1.** Nitrate ( $\text{NO}_3^-$ ) concentrations in benthic flux chambers with  $^{15}\text{NO}_3^-$  additions.

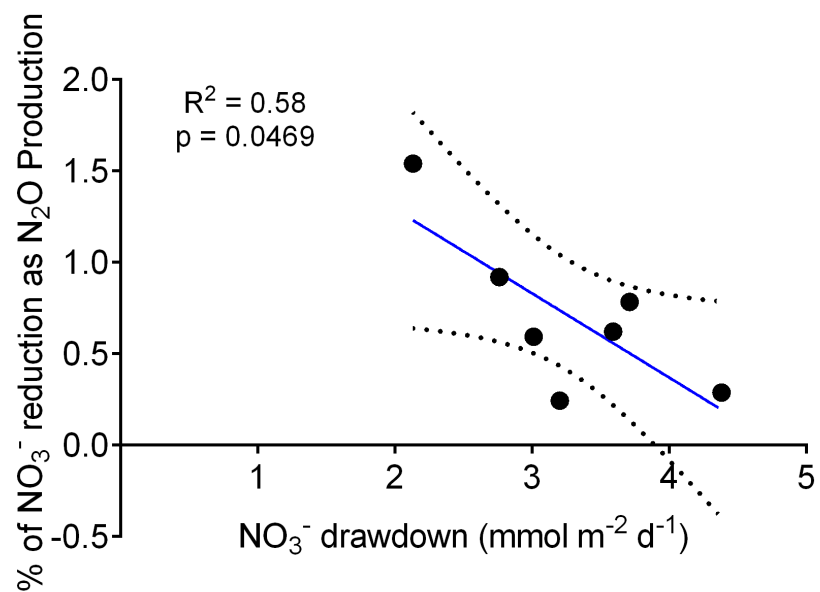

**Figure S2.** The correlation between NO<sub>3</sub><sup>-</sup> drawdown rates measured from benthic flux chambers without <sup>15</sup>NO<sub>3</sub><sup>-</sup> additions and the fraction of NO<sub>3</sub><sup>-</sup> reduction as N<sub>2</sub>O production. The solid line represents the best fit linear regression, and the dashed lines represent the 95% confidence interval.

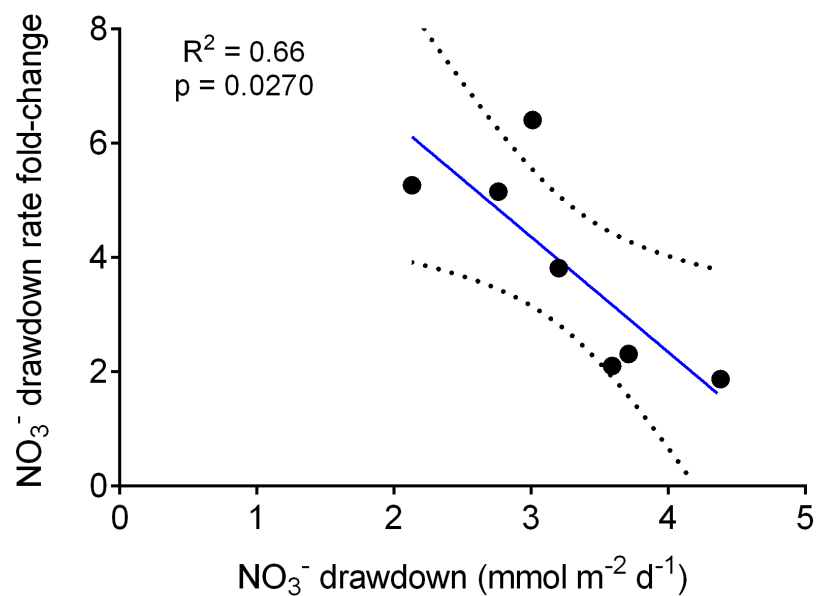

**Figure S3.** The correlation between  $\text{NO}_3^-$  drawdown rates measured from benthic flux chambers without  $^{15}\text{NO}_3^-$  additions and the  $\text{NO}_3^-$  drawdown rate fold-change as a result of  $^{15}\text{NO}_3^-$  additions (Table S2). The solid line represents the best fit linear regression, and the dashed lines represent the 95% confidence interval band.

**Table S1.** Detection limits of the rates of N<sub>2</sub> production from denitrification, N<sub>2</sub> production from anaerobic ammonia oxidation (anammox), NH<sub>4</sub><sup>+</sup> production from dissimilatory nitrate reduction to ammonia (DNRA), and N<sub>2</sub>O production.

| <b>Station</b>                                                                            | <b>NDT3-D</b> | <b>NDT3-C</b> | <b>NDT3-A</b> | <b>NDRO</b> | <b>SDRO</b> | <b>SDT3-A</b> | <b>SDT3-C</b> |
|-------------------------------------------------------------------------------------------|---------------|---------------|---------------|-------------|-------------|---------------|---------------|
| N <sub>2</sub> production - denitrification (mmol m <sup>-2</sup> d <sup>-1</sup> )       | 0.053         | 0.174         | 0.092         | 0.156       | 0.200       | 0.042         | 0.051         |
| N <sub>2</sub> production - anammox (mmol m <sup>-2</sup> d <sup>-1</sup> )               | 0.027         | 0.083         | 0.032         | 0.238       | 0.202       | 0.033         | 0.041         |
| NH <sub>4</sub> <sup>+</sup> production from DNRA (mmol m <sup>-2</sup> d <sup>-1</sup> ) | 0.006         | 0.022         | 0.026         | 0.018       | 0.071       | 0.010         | 0.029         |
| N <sub>2</sub> O production (μmol m <sup>-2</sup> d <sup>-1</sup> )                       | 2.46          | 1.46          | 1.11          | 1.25        | 5.60        | 3.94          | 2.94          |

**Table S2.** The degree of  $^{15}\text{NO}_3^-$  enrichment, the fold change in bottom water  $\text{NO}_3^-$  concentration as a result of  $^{15}\text{NO}_3^-$  addition; areal rates of  $\text{NO}_3^-$  drawdown with and without  $^{15}\text{NO}_3^-$  addition and the calculated fold change.

| Station                                                                                                          | NDT3-D | NDT3-C | NDT3-A | NDRO | SDRO | SDT3-A | SDT3-C |
|------------------------------------------------------------------------------------------------------------------|--------|--------|--------|------|------|--------|--------|
| % of $^{15}\text{NO}_3^-$                                                                                        | 67%    | 62%    | 66%    | 73%  | 86%  | 77%    | 70%    |
| $\text{NO}_3^-$ fold change                                                                                      | 1.99   | 1.62   | 1.90   | 2.75 | 6.17 | 3.43   | 2.30   |
| $\text{NO}_3^-$ drawdown rate <u>without</u> $^{15}\text{NO}_3^-$ addition (mmol $\text{m}^{-2} \text{d}^{-1}$ ) | 2.76   | 4.38   | 3.20   | 3.59 | 3.71 | 3.01   | 2.13   |
| $\text{NO}_3^-$ drawdown rate <u>with</u> $^{15}\text{NO}_3^-$ addition (mmol $\text{m}^{-2} \text{d}^{-1}$ )    | 14.22  | 8.19   | 12.21  | 7.53 | 8.58 | 19.26  | 11.22  |
| $\text{NO}_3^-$ drawdown rate fold change                                                                        | 5.15   | 1.87   | 3.81   | 2.10 | 2.31 | 6.40   | 5.26   |

**Table S3.** The contribution to  $^{30}\text{N}_2$  production by coupled DNRA-anammox.

| Station          | NDT3-D | NDT3-C | NDT3-A | NDRO | SDRO | SDT3-A | SDT3-C |
|------------------|--------|--------|--------|------|------|--------|--------|
| Contribution (%) | 2.0%   | 1.9%   | 0.8%   | 1.5% | 1.4% | 0.9%   | 1.7%   |

**Table S4.** Bottom water nitrous oxide ( $\text{N}_2\text{O}$ ) concentration and saturation at the beginning ( $T_0$ ) of in-situ incubations. The saturation concentration of  $\text{N}_2\text{O}$  (12.16 nM) was calculated using the solubility equation from Weiss and Price (1980).

| Station                                 | NDT3-D | NDT3-C | NDT3-A | NDRO | SDRO | SDT3-A | SDT3-C |
|-----------------------------------------|--------|--------|--------|------|------|--------|--------|
| $\text{N}_2\text{O}$ concentration (nM) | 19.1   | 13.6   | 11.7   | 1.5  | 1.2  | 18.2   | 13.0   |
| $\text{N}_2\text{O}$ saturation         | 157%   | 112%   | 96%    | 12%  | 9%   | 150%   | 107%   |
